1 **Community origins and regional differences in plasmid-mediated fluoroquinolone resistant**  
2 **Enterobacteriaceae infections in children**

3 **Authors:** Latania K. Logan, MD, MSc<sup>a,b,i,j</sup>, Rachel L. Medernach, MD<sup>a,h</sup>, Jared R. Rispens,  
4 MD<sup>a,h</sup>, Steven H. Marshall, MS<sup>b</sup>, Andrea M. Hujer, BS<sup>b,c</sup>, T. Nicholas Domitrovic, MS<sup>b,c</sup>, Susan  
5 D. Rudin, BS<sup>b,c</sup>, Xiaotian Zheng, MD, PhD<sup>e,f</sup>, Nadia K. Qureshi, MD<sup>g</sup>, Sreenivas Konda, PhD<sup>i</sup>,  
6 Mary K. Hayden, MD<sup>h</sup>, Robert A. Weinstein, MD<sup>h,j</sup>, and Robert A. Bonomo, MD<sup>b,c,d</sup>

7 <sup>a</sup>Pediatrics, Rush University Medical Center, Chicago, Illinois, United States; <sup>b</sup>Research Service,  
8 Louis Stokes Cleveland Department of Veterans Affairs Medical Center, Cleveland, Ohio;  
9 <sup>c</sup>Medicine, Case Western Reserve School of Medicine, Cleveland, Ohio; <sup>d</sup>Pharmacology,  
10 Molecular Biology, and Microbiology, Case Western Reserve School of Medicine, Cleveland,  
11 Ohio; <sup>e</sup>Microbiology, Ann & Robert H. Lurie Children's Hospital of Chicago, Chicago, Illinois,  
12 United States; <sup>f</sup>Pathology, Northwestern Feinberg School of Medicine, Chicago, Illinois, United  
13 States; <sup>g</sup>Pediatrics, Loyola University Medical Center, Maywood, Illinois, United States,  
14 <sup>h</sup>Medicine, Rush University Medical Center, Chicago, Illinois, United States, <sup>i</sup> University of  
15 Illinois at Chicago, Chicago, Illinois, and <sup>j</sup>Cook County Health and Hospital Systems, Chicago,  
16 Illinois, United States

17  
18 **Running Title:** Community Origins of PMFQR Enterobacteriaceae

19 **Corresponding Author:** Latania K. Logan, Rush University Medical Center 1620 W. Harrison,  
20 Suite 951 Jelke, Chicago, IL 60612; Phone 312-942-8928; Email: [Latania\\_Logan@rush.edu](mailto:Latania_Logan@rush.edu)

21 **Key words:** Epidemiology; Gram-negative bacteria; *Enterobacteriaceae* infections; drug  
22 resistance, children  
23  
24

25 **Abstract**

26 Fluoroquinolones (FQs) are uncommonly prescribed in children, yet pediatric multidrug-resistant  
27 (MDR)-Enterobacteriaceae (Ent) infections often reveal FQ resistance (FQR). We sought to  
28 define the molecular epidemiology of FQR and MDR-Ent in children. A case-control analysis of  
29 children with MDR-Ent infections at 3 Chicago hospitals was performed. Cases were children  
30 with third-generation-cephalosporin-resistant (3GCR) and/or carbapenem-resistant (CR)-Ent  
31 infections. PCR and DNA analysis assessed *bla* and plasmid-mediated FQR (PMFQR) genes.  
32 Controls were children with 3GC and carbapenem susceptible-Ent infections matched by age,  
33 source and hospital. We assessed clinical-epidemiologic predictors of PMFQR Ent infection.  
34 Of 169 3GCR and/or CR Ent isolates from children (median age 4.8 years), 85 were FQR; 56  
35 (66%) contained PMFQR genes. The predominant organism was *E. coli* and most common *bla*  
36 gene *bla*<sub>CTX-M-1</sub> group. In FQR isolates, PMFQR gene mutations included *aac6'1b-*  
37 *cr*, *oqxA/B*, *qepA*, and *qnrA/B/D/S* in 83%, 15%, 13% and 11% of isolates, respectively. FQR *E.*  
38 *coli* was often associated with phylogroup B2, ST43/ST131. On multivariable analysis,  
39 PMFQR Ent infections occurred mostly in outpatients (OR 33.1) of non-black-white-Hispanic  
40 race (OR 6.5). Residents of Southwest Chicago were >5 times more likely to have PMFQR-  
41 Ent infections than those in the reference region, while residence in Central Chicago was  
42 associated with a 97% decreased risk. Other demographic, comorbidity, invasive-device,  
43 antibiotic use, or healthcare differences were not found. The strong association of infection with  
44 MDROs showing FQR with patient residence rather than with traditional risk factors suggests  
45 that the community environment is a major contributor to spread of these pathogens in children.

46

47

## 48 **Introduction**

49 Multi-drug resistant (MDR) Enterobacteriaceae infections are associated with significant  
50 morbidity and mortality and are an emerging problem in children in the US during the last  
51 decade (1, 2). Globally, this has been attributed mainly to the rise in extended-spectrum beta  
52 lactamase (ESBL) producing Enterobacteriaceae (ESBL Ent) and carbapenem-resistant  
53 Enterobacteriaceae (CRE) (3, 4). Increasing resistance to several other classes of antibiotics was  
54 found in these studies; including to the fluoroquinolones, a class of antibiotics with limited  
55 indications for use in children (1, 2).

56 The CTX-M-ESBL harboring *Escherichia coli* are among the most common multi-drug  
57 resistant organisms (MDROs), often possessing resistance genes to other important antibiotic  
58 classes including aminoglycosides, fluoroquinolones, tetracyclines, and trimethoprim-  
59 sulfamethoxazole (5, 6). In adults, fluoroquinolone resistance in (FQR) Gram-negative bacteria  
60 has been linked to chromosomal and to plasmid-mediated resistance mechanisms and is thought  
61 to be associated mostly with the dramatic increase in use of these antibiotics during the 1980s(7,  
62 8).

63 The reasons for increased FQR in children are unclear, and studies assessing the  
64 resistance determinants associated with the FQR phenotype in Enterobacteriaceae recovered  
65 from children are limited(9); therefore, we examined this population to determine which children  
66 had a higher likelihood of infections with organisms resistant to both beta-lactam and  
67 fluoroquinolone antibiotics.

68 We determined the genetic basis of FQR in beta-lactamase producing Enterobacteriaceae  
69 isolates from children cared for by multiple centers in the Chicago area and analyzed a subgroup

70 of children with infections with similar resistance determinants, namely those due to isolates  
71 containing genes encoding plasmid-mediated fluoroquinolone resistance (PMFQR) and ESBL  
72 mediated resistance to determine genotypes, host factors, and exposures leading to infection with  
73 MDR Enterobacteriaceae strains. We hypothesized that because of differences in healthcare  
74 delivery in urban settings, acquisition of PMFQR in children would be linked to geographic  
75 location and have environmental influences and community origins. Our analysis revealed that  
76 there are genetic and geospatial links to MDR in this pediatric population.

## 77 **METHODS**

### 78 **Study Setting**

79 Hospital A contains a 115-bed children's hospital within a tertiary care academic medical  
80 center which has a mother-newborn infant unit, pediatric and psychiatric wards, and cardiac,  
81 pediatric and neonatal intensive-care units (PICU and NICU). Hospital B has 288 beds and is a  
82 free-standing children's academic medical center that provides complex quaternary services,  
83 such as pediatric organ and bone marrow transplantation. Hospital C is a 125-bed children's  
84 hospital within an academic medical center, and contains general pediatrics and newborn infant  
85 wards, as well as a PICU and NICU. All of the participating centers are within metropolitan  
86 Chicago.

### 87 **Descriptive Study Design**

### 88 **Study Population**

89 This study included patients aged 0 to 18.99 years who had clinical cultures positive for  
90 Enterobacteriaceae with 3GCR or CR and the suspected presence of a beta-lactamase gene based

91 on clinical laboratory testing. Additionally, isolates found to be concomitantly resistant to FQR  
92 were further characterized. Infections were diagnosed between January 1, 2011 and December  
93 31, 2014 and only the first infection per patient was included. The study was approved by the  
94 institutional review boards of the three participating institutions and need for informed consent  
95 was waived.

#### 96 **Testing of Antibiotic Susceptibility in Enterobacteriaceae**

97 The Hospitals A-C microbiology laboratories phenotypically analyzed presumed ESBL  
98 Ent, AmpC Ent and CR isolates via the Vitek 2 microbial identification system (*bioMérieux*,  
99 *Athens, GA*) or by the MicroScan WalkAway system (Siemens Healthcare Diagnostics,  
100 Tarrytown, NY). Screening for ESBL production involved testing with one or more of the  
101 following agents: aztreonam, ceftazidime, ceftriaxone, cefotaxime or cefpodoxime, based on  
102 guidelines of the Clinical and Laboratory Standards Institute (CLSI) (10). ESBL production was  
103 confirmed on the automated instruments or by disk diffusion assays (BBL; Becton, Dickinson  
104 and Company, Sparks, MD) or by measuring minimum inhibitory concentrations (MICs) of  
105 ceftazidime and cefotaxime in the presence and absence of clavulanic acid. A measurement of an  
106 increase in disk zone diameter of > 5 mm or a 4-fold reduction in the MIC of ceftazidime or  
107 cefotaxime in the presence of clavulanic acid served as confirmation of the ESBL phenotype  
108 (10).

109 The carbapenemase phenotype, per Centers for Disease Control and Prevention (CDC)  
110 criteria, included isolates that were non-susceptible to all 3GCs (cefotaxime, ceftazidime, or  
111 ceftriaxone) and resistant to one or more carbapenem (imipenem, meropenem, doripenem, or  
112 ertapenem) (11). Carbapenemase production was phenotypically confirmed by MBL E-test  
113 (*bioMérieux*, *Athens, GA*) or Modified Hodge Test, as appropriate (12, 13).

## 114 **Determination of Beta-Lactam Resistance Mechanisms**

115 Genomic DNA was extracted and purified from isolates using the DNeasy Blood &  
116 Tissue Kit (QIAGEN, Inc., Valencia, CA). To evaluate for the presence of *bla* genes in isolates,  
117 a DNA microarray based assay was performed (Check-Points, Check-MDR CT101 kit;  
118 Wageningen, The Netherlands). The CT101 microarray based assay can detect the following *bla*  
119 groups: CTX-M-1 group, CTX-M-2 group, CTX-M-8 and -25 group, CTX-M-9 group, SHV WT  
120 and SHV-type ESBL, TEM wild-type, and TEM-type ESBL, plasmid based AmpC  
121 cephalosporinases (pAmpC) (CMY II, ACC, FOX, DHA, ACT/ MIR) and carbapenemases  
122 (KPC and NDM) (14). When isolates were *bla* negative by the CT101 assay, a broader DNA  
123 microarray, (Check-Points, Check-MDR CT103XL kit) was performed. The CT103XL assay  
124 can detect the presence of additional ESBL genes (VEB, PER, BEL, GES) and carbapenemase  
125 genes (GES, GIM, IMP, SPM, VIM, and OXA-23, -24/40, -48, and -58) (15). The assays were  
126 performed as described in our laboratory previously (16).

## 127 **Analysis of Determinants Yielding Fluoroquinolone Resistance**

128 To investigate the presence of FQR determinants in MDR Enterobacteriaceae isolates, we  
129 analyzed the quinolone resistance-determining region (QRDR) located on the bacterial  
130 chromosome and assessed for PMFQR in strains found FQR by CLSI standards (10). Briefly,  
131 genus specific assays for mutations in *gyrA* and *parC* genes of the QRDR (in *E. coli*, *Klebsiella*  
132 *sp.*, and *Enterobacter sp.*) and for PMFQR were performed by polymerase chain reaction (PCR)  
133 and deoxyribonucleic acid (DNA) sequencing of amplicons (7). Extraction of genomic DNA  
134 followed by amplification and sequencing were performed using primers and methods as  
135 previously described (17-19). Specific PMFQR genes screened include *qnrA*, *qnrB*, *qnrD*, *qnrS*,

136 *qepA*, *oqxA* and *oqxB* and *aac6'-Ib-cr* and represent transmissible elements reported in  
137 Enterobacteriaceae (20, 21) .

### 138 **Multilocus Sequence Typing (MLST)**

139 Per protocol, eight *E. coli* housekeeping genes (*dinB*, *icdA*, *pabB*, *polB*, *putP*, *trpA*, *trpB*  
140 and *uidA*) and seven *Klebsiella* species (sp.) housekeeping genes (*rpoB*, *gapA*, *mdh*, *pgi*, *phoE*,  
141 *tonB*, *infB*) were amplified and sequenced as in prior studies (16, 22, 23). Alleles and sequence  
142 types (ST) were assigned for select isolates of varying genotypic profiles by the Pasteur MLST  
143 scheme (<http://www.pasteur.fr/recherche/genopole/PF8/mlst/>).

### 144 **Analysis of Plasmid Replicon Types and Phylogenetic Grouping**

145 *E. coli* were assigned to four major phylogenetic groups (A, B1, B2 and D) using a well-  
146 established multiplex PCR-based method (24). Plasmids were typed, in select isolates with  
147 varying genotypic profiles, based on incompatibility groups corresponding to the nomenclature  
148 assigned by Carattoli *et al.* (25).

### 149 **Analytic Study Design**

150  
151 We used a retrospective case–control study design to assess factors associated with  
152 infection due to beta-lactam, FQ resistant isolates in which we had detected a PMFQR gene. We  
153 chose to analyze FQR in detail because this class of antibiotics is uncommonly used in children,  
154 yet 50% of the isolates between 2011 and 2014 were FQR.

155 We selected as controls, children with infections due to bacteria susceptible to the  
156 antibiotics of interest. Specifically, the control group included children with infections that were  
157 susceptible to 3GC, carbapenem and FQ antibiotics to understand differences between children  
158 who acquired plasmid-mediated MDR Enterobacteriaceae infections and those who did not.

159           Only patients with clinical infections were included, as determined by study investigator  
160 case review and/or using standard criteria defined by the CDC National Healthcare Safety  
161 Network (26). Children serving as control subjects were identified using hospital electronic  
162 laboratory records (ELRs). Control patients were matched approximately 3:1 to the cases by age  
163 range, hospital, and specimen source.

#### 164 **Covariates**

165           Several variables were analyzed as potential factors associated with FQR Ent infection  
166 based on known associations for acquisition in adults including (1) demographics (age, gender,  
167 race/ethnicity); (2) comorbid conditions (as defined by ICD-9 codes); (3) recent inpatient and  
168 outpatient healthcare exposures, including hospitalization and/or procedures in the previous 30  
169 days; (4) all recent antibiotic exposures in the 40 days prior to culture; (5) presence, number, and  
170 type of invasive medical devices; and (6) the impact of location of patient residence in the  
171 Chicago area as assessed by dividing the metropolitan area into 7 regions using zip code level  
172 data, which included Chicago proper and its suburban areas (i.e. Northwest side and Northwest  
173 Suburbs, Southwest side and Southwest Suburbs, etc.). An eighth region included patients from  
174 other parts of Illinois or from other states.

#### 175 **Statistical Analysis**

176           Case and control groups were examined for differences using parametric or non-  
177 parametric tests as appropriate for categorical and continuous variables;  $P \leq 0.05$  was considered  
178 statistically significant unless otherwise specified. Variables with  $p < 0.1$  on bivariate analysis  
179 were included in multivariable analysis. Stepwise multiple logistic regression was used to assess  
180 the multivariable relationship between the covariates and the groups. The final multivariable  
181 logistic regression model included the simplest model with significant covariates ( $p < 0.05$ ) from



182 the stepwise selection process, with PMFQR Ent infection as the outcome variable. The simplest  
183 model was chosen based on a relatively small sample size and the effect of variables in the  
184 model. All analyses were performed in SAS 9.4 (SAS Institute, Cary, NC, USA).

## 185 **RESULTS**

### 186 **Composition of Fluoroquinolone Resistance (FQR) Genes in Enterobacteriaceae**

187 We assessed 169 *bla*-producing Ent isolates between 2011 – 2014 from Hospitals A, B,  
188 and C for the presence of FQR (Table 1). Of 169 Ent isolates, 85 (50%) were FQR of which 82  
189 (96.4%) were available for further testing. The median age of children with FQR-Ent infections  
190 was 4.8 years. The predominant organism was *E. coli*, 65/82 (79%), and the predominant *bla*  
191 genotype found associated with FQR in Ent was *bla*<sub>CTX-M-1-group</sub> in 62% of cases. Within *E. coli*,  
192 FQR was most often associated with phylogroup B2 and ST43 (Pasteur scheme)/ST131  
193 (Achtman scheme) harboring *bla*<sub>CTX-M-1-group</sub> in 47/63 (75%) cases.

194 FQR isolates were further characterized to understand resistance determinants associated  
195 with FQR in pediatric Ent isolates. Chromosomal mutations of the QRDR (*gyrA/parC*) were  
196 present in 71/79 (89.9%) of FQR isolates by DNA sequence analysis. Three isolates did not yield  
197 results. PMFQR genes were detected by PCR in 56/82 (66%); 53 (95%) were available for  
198 further analysis. The median case patient age was 6 years. PMFQR genes included *aac 6' Ib-*  
199 *cr*, *oqx A/B*, *qepA*, and *qnr A/B/D/S* in 83%, 15%, 13% and 11% of isolates, respectively.  
200 PMFQR was found in combination with *gyrA* and/or *parC* mutations in 43/49 (88%) isolates,  
201 which is associated with high level resistance. The predominant *bla* genotype found associated  
202 with PMFQR was *bla*<sub>CTX-M-1-group</sub> in 76%, followed by *bla*<sub>SHV</sub> ESBL associations in 11%. Almost  
203 all (98%) PMFQR Ent were multi-drug resistant, e.g. resistant to  $\geq 3$  antibiotic classes.

### 204 **Analysis of Factors Associated with PMFQR Enterobacteriaceae Infections in Children**

205           The 53 cases of PMFQR Ent infection were matched by age range, hospital, and culture  
206 source to 131 controls with antibiotic-sensitive Ent infections. Significant factors associated with  
207 PMFQR Ent infection on bivariate analysis included: *E. coli* infection, race/ethnicity, infection  
208 diagnosed in an outpatient clinic, history of quinolone use, and residence in the Southwest region  
209 (hereafter referred to as the high-risk region) comprised of southwest Chicago and the  
210 southwestern Chicago suburbs (Table 2). Children with PMFQR infection were less likely to  
211 have infection with *Enterobacter* sp., a central venous catheter, neonatal intensive care unit  
212 admission at the time of infection diagnosis, or residence outside the “high-risk” region  
213 (comprised of the downtown Chicago area, near North side, Chicago loop, and North Chicago).  
214 Case-control differences in comorbid conditions; presence of respiratory, gastrointestinal,  
215 genitourinary, or overall count of foreign bodies; or recent prior healthcare exposure were not  
216 found.

217           We did not find evidence of significant effect modification during the model building  
218 stages nor did we find evidence of significant confounding; therefore, no additional covariates  
219 were added back to the final model after the stepwise selection process was completed, and the  
220 simplest model was used in the final regression model.

221           On multivariable analysis (Table 3), having infection diagnosed in the outpatient clinic  
222 setting was significantly associated with PMFQR Enterobacteriaceae infection (OR=33.1; 95%  
223 CI 7.1, 162.8;  $p<0.001$ ). Being of a race or ethnicity other than white, black, or Hispanic was  
224 significantly associated with PMFQR Enterobacteriaceae infection (OR 6.5; 95% CI 1.7, 24.3;  
225  $p=0.006$ ). Interestingly, among children with Enterobacteriaceae infections, those residing in  
226 southwestern region of Chicago had more than five times the odds of having a PMFQR infection

227 compared to those living in the reference West Chicago region (OR 5.6; 95% CI 1.6, 19.2;  
228  $p=0.006$ ) after controlling for race and healthcare setting. In contrast, for children who resided in  
229 the downtown region, there was a 97% decrease in the odds of PMFQR infection in those living  
230 in this region compared to those residing in reference West Chicago region (OR 0.03; 95% CI  
231 .002, 0.33;  $p=0.005$ ). No other regional associations were found.

232 To ensure these regional associations were unique to PMFQR containing isolates, we ran  
233 two additional case-control analyses specifically assessing whether regional differences within  
234 the Chicago metropolitan area were seen with 1) ESBL-producing strains that were sensitive to  
235 fluoroquinolones; and 2) *bla*<sub>CTX-M-1group</sub> ESBL-producing isolates (related to circulation of ST131  
236 clonal *E. coli* strains). Regional differences in acquisition were not found in either analysis (data  
237 not shown).

## 238 DISCUSSION

239  
240  
241 Multi-drug resistant Enterobacteriaceae are a growing concern globally. Much of the  
242 propagation and spread of these organisms has been related to the ST131 *E. coli* strains and to  
243 high-risk clones containing IncFII plasmids and other genetic structures, such as transposons,  
244 integrons, and insertion sequences associated with multiple antibiotic resistance gene cassettes  
245 (27). Occasionally, beta-lactamase and other antibiotic resistance genes are transferred  
246 horizontally (28).

247 In our pediatric patients there was a predominance of ST131 *E. coli* harboring *bla*<sub>CTX-M</sub>.  
248 We hypothesize that there is significant horizontal gene transfer between genera. This is very  
249 worrisome from a public health perspective since children, once colonized with MDR  
250 Enterobacteriaceae can remain colonized for months to years and could serve as reservoirs and

251 “silent disseminators” of MDROs (29, 30). Interestingly, the community focus of the MDROs in  
252 children is in stark contrast to the epidemiology of these bacteria in adults in Chicago, where  
253 MDR Enterobacteriaceae acquisition is highly linked to residence in long-term care facilities and  
254 to interfacility transfer (31, 32).

255 We found striking residential differences for children infected with PMFQR containing  
256 Enterobacteriaceae (PMFQR Ent) compared to children infected with antibiotic sensitive strains.  
257 PMFQR Ent contain plasmid-based resistance genes to fluoroquinolones, an antibiotic  
258 uncommonly used in children. In one Chicago region, the Southwest region, there was a  
259 substantial increase in odds of PMFQR Ent infection, and in the Downtown region, there was a  
260 significant decrease in the likelihood of PMFQR Ent infection (Figure 1). Our study included 3  
261 major pediatric centers, none of which (and no major medical centers for children) is located in  
262 the “high-risk” Southwest region, yet all three centers diagnosed and treated patients with  
263 PMFQR Ent infections from that region. In contrast, Hospital B, the largest hospital in the region  
264 specifically dedicated to the care of children, is located in the downtown region, and therefore  
265 services many children residing in that area; yet this was the area of “lowest risk” for PMFQR  
266 Ent infection. This may reflect linkage to *bla*<sub>CTX-M</sub> harboring plasmids which are endemic in  
267 some communities, but the reservoirs are currently undefined.

268 Interestingly, we found that children with PMFQR Ent infection were more likely to  
269 present in the outpatient clinic setting than were those with antibiotic sensitive Ent infections –  
270 the opposite of expectation that MDROs are healthcare linked and suggesting that PMFQR Ent  
271 infections were community acquired and less severe.

272           A strong additional association on multivariable analysis was the higher likelihood of  
273 PMFQR Ent infection in those of non-white, non-black, and non-Hispanic race. This risk was  
274 statistically independent of residence, and strikingly none of the children located in the “high  
275 risk” southwest region with PMFQR Ent infection were of race “other”, supporting the strong  
276 independence of these 2 risk factors. Due to the retrospective nature of the study, we were  
277 unable to gather further data on “other” race or ethnicity. We did not have travel data for the  
278 majority of children, although it is well documented that travel to certain countries can be  
279 associated with high rates of ESBL Ent acquisition, particularly in South and Southeast Asia (30,  
280 33, 34). It is also well described that there is an increased risk of colonization of household  
281 members after return of the traveler who first acquired an ESBL Ent.(35, 36)

282           We did not find significant differences in comorbidities between cases and controls. This  
283 puts further importance on evaluating environmental sources for plasmid-possessing antibiotic  
284 resistance genes (32). Community-based environmental influences would include higher  
285 exposure risks in certain communities due to certain foods, livestock, animals, water sources,  
286 fertilizer, soil, and vegetation (37). For example, if there is a link to food exposures, such as  
287 restaurant chains that cook with high saturated fats, and additionally serve food animals that are  
288 fed antibiotics and hormones for growth effects, this exposure would increase the risk of  
289 acquisition of antibiotic-resistant bacteria, as well as obesity (38, 39). This in turn increases the  
290 risk of other diseases such as cardiovascular disease and diabetes (40). Some of the PMFQR  
291 genes, for example, *oqxA* and *oqxB* are multidrug efflux pumps named for their resistance to  
292 olaquinadox, which is used as a growth promoter on pig farms (41).

293           Studies in our region and nationally have suggested that an increased risk of exposure to  
294 antibiotics in children (42), as well as to antibiotic resistant bacteria, may be related to  
295 socioeconomic status and race (43, 44). While we did assess race, we did not formally compare  
296 differences between socioeconomic factors in the regions, as we did not have street or  
297 neighborhood level data on infected patients. However, in a general comparison of regional zip  
298 codes using Illinois census data, we did not find overall differences in the socioeconomic status  
299 of the “high risk” southwest region and neighboring regions such as the south and west regions.

300           We recognize that our study has limitations. This was a retrospective study designed to  
301 determine mechanisms of antibiotic resistance in Enterobacteriaceae recovered from children  
302 cared for at three centers in a single metropolitan area; this may potentially impact  
303 generalizability to other regions. Additionally, a plasmid-based origin of the recovered  
304 antibiotic-resistance genes is suggested by our DNA sequence analysis results, yet it is possible  
305 that some of these genes represent chromosomal resistance mechanisms. However, subsequent  
306 plasmid-replicon typing and DNA sequence analysis for a subgroup of bacteria support our  
307 findings of the DNA microarray. Our sample size was relatively small, which may allow for  
308 selection bias; however, the pooling of multicentered data from institutions of differing types  
309 serving diverse populations throughout the 3rd largest metropolitan area in the U.S. potentially  
310 lessens this bias. The smaller sample sizes in pediatric studies are related to the overall low  
311 prevalence of these organisms in children in most U.S. areas (1-3%), including in the Chicago  
312 and the Midwest region (29, 32, 34, 45, 46), although national trends indicate an increase in  
313 prevalence of these menacing organisms in pediatric populations during the last decade,  
314 suggesting they are an emerging threat that needs further evaluation (46-49).

315 In conclusion, we found that there is significant complexity and diversity in the  
316 determinants associated with beta-lactam and fluoroquinolone antibiotic resistance in children,  
317 and that pediatric MDR Enterobacteriaceae exhibited differences when compared to descriptions  
318 of strains circulating in adult patients in a region where such infections are endemic. We also  
319 describe, for the first time, the impact of residence on infection with MDR Enterobacteriaceae in  
320 children located in the same geographic area, however the reservoirs remain undefined. Future  
321 studies should focus on further molecular characterization of circulating strains and the  
322 environmental influences associated with these differences in regional acquisition. We anticipate  
323 that an imminent threat of the “silent dissemination” of multi-drug resistant Enterobacteriaceae  
324 in community settings is occurring in children. Local, federal, and international programs  
325 dedicated to this serious problem must focus on halting the spread of these menacing pathogens  
326 in our most vulnerable population, children.

### 327 **Acknowledgements**

328 We gratefully acknowledge the contribution of the late Dr. Paul Schreckenberger to this work.  
329 We thank the microbiology laboratories of the participating institutions for providing isolates for  
330 this study. We thank Kendrick Reme of the Logan Laboratory and Pamela Hagen, Jane Stevens,  
331 Joyce Houlihan, Kathleen McKinley, Violeta Rekasiu, Cindy Bethel, and Donna Carter of  
332 participating institutions for collection, shipping, and cultivation of organisms. We thank the  
333 team of curators of the Institut Pasteur MLST and whole-genome MLST databases for curating  
334 the data and making them publicly available at <http://bigsdh.web.pasteur.fr/>. We report no  
335 conflicts of interest relevant to this study.  
336 The content is solely the responsibility of the authors and does not necessarily represent the  
337 official views of the National Institutes of Health or the Department of Veterans Affairs.

338 **Funding**

339 This work, including the efforts of Latania K. Logan, was funded by the National Institute of  
340 Allergy and Infectious Diseases, National Institutes of Health (NIH) (K08AI112506). This work,  
341 including the efforts of Robert A. Bonomo, was funded by the National Institute of Allergy and  
342 Infectious Diseases, National Institutes of Health (NIH) (R01AI072219, R01AI063517, and  
343 R01AI100560). R.A.B. is also supported by the Department of Veterans Affairs Research and  
344 Development under award number I01BX001974, VISN 10 Geriatrics Research, Education and  
345 Clinical Center.

346 **Financial Disclosure:** The authors have no financial disclosures relevant to this article.

347 **Conflicts of Interest:** The authors have no conflicts of interest relevant to this article.

348

349 **References**

350 1. **Logan, L. K., N. P. Braykov, R. A. Weinstein, and R. Laxminarayan.** 2014. Extended-  
351 Spectrum  $\beta$ -Lactamase–Producing and Third-Generation Cephalosporin-Resistant  
352 Enterobacteriaceae in Children: Trends in the United States, 1999–2011. *Journal of the Pediatric*  
353 *Infectious Diseases Society*. . doi: 10.1093/jpids/piu010.

354 2. **Logan, L. K., J. P. Renschler, S. Gandra, R. A. Weinstein, R. Laxminarayan, Centers for**  
355 **Disease Control, and Prevention Epicenters Program.** 2015. Carbapenem-Resistant  
356 Enterobacteriaceae in Children, United States, 1999-2012. *Emerg. Infect. Dis.* **21**:2014-2021.  
357 doi: 10.3201/eid2111.150548 [doi].

358 3. **Lukac, P. J., R. A. Bonomo, and L. K. Logan.** 2015. Extended-spectrum  $\beta$ -lactamase–  
359 producing Enterobacteriaceae in children: old foe, emerging threat. *Clinical Infectious Diseases.*  
360 **60**:1389-1397.

361 4. **Logan, L. K., and R. A. Weinstein.** 2017. The Epidemiology of Carbapenem-Resistant  
362 Enterobacteriaceae: The Impact and Evolution of a Global Menace. *J. Infect. Dis.* **215**:S28-S36.

363 5. **Cantón, R., and T. M. Coque.** 2006. The CTX-M  $\beta$ -lactamase pandemic. *Curr. Opin.*  
364 *Microbiol.* **9**:466-475.



- 365 6. **Munoz-Price, L. S., L. Poirel, R. A. Bonomo, M. J. Schwaber, G. L. Daikos, M.**  
366 **Cormican, G. Cornaglia, J. Garau, M. Gniadkowski, and M. K. Hayden.** 2013. Clinical  
367 epidemiology of the global expansion of *Klebsiella pneumoniae* carbapenemases. *The Lancet*  
368 *Infectious Diseases.* **13**:785-796.
- 369 7. **Robicsek, A., G. A. Jacoby, and D. C. Hooper.** 2006. The worldwide emergence of plasmid-  
370 mediated quinolone resistance. *The Lancet Infectious Diseases.* **6**:629-640.
- 371 8. **Mathers, A. J., G. Peirano, and J. D. D. Pitout.** 2015. The Role of Epidemic Resistance  
372 Plasmids and International High-Risk Clones in the Spread of Multidrug-Resistant  
373 Enterobacteriaceae. *Clinical Microbiology Reviews.* **28**:565-591. doi: 10.1128/CMR.00116-14.
- 374 9. **Medernach, R. L., and L. K. Logan.** 2018. The Growing Threat of Antibiotic Resistance in  
375 Children. *Infect. Dis. Clin. North Am.* **32**:1-17.
- 376 10. **Clinical and Laboratory Standards Institute.** 2010. Performance Standards for  
377 Antimicrobial Susceptibility Testing: Twentieth Informational Supplement (June 2010 Update).  
378 December 29, 2011.
- 379 11. **Centers for Disease Control and Prevention (CDC).** CDC - 2012 CRE Toolkit - Guidance  
380 for Control of Carbapenem-resistant Enterobacteriaceae (CRE). **2015**..
- 381 12. **Centers for Disease Control and Prevention.** 2013. Modified Hodge Test for  
382 Carbapenemase Detection in Enterobacteriaceae. .
- 383 13. **Birgy, A., P. Bidet, N. Genel, C. Doit, D. Decre, G. Arlet, and E. Bingen.** 2012.  
384 Phenotypic screening of carbapenemases and associated beta-lactamases in carbapenem-resistant  
385 Enterobacteriaceae. *J. Clin. Microbiol.* **50**:1295-1302. doi: 10.1128/JCM.06131-11 [doi].
- 386 14. **Bogaerts, P., A. M. Hujer, T. Naas, R. R. de Castro, A. Endimiani, P. Nordmann, Y.**  
387 **Glupczynski, and R. A. Bonomo.** 2011. Multicenter evaluation of a new DNA microarray for  
388 rapid detection of clinically relevant bla genes from beta-lactam-resistant gram-negative bacteria.  
389 *Antimicrob. Agents Chemother.* **55**:4457-4460. doi: 10.1128/AAC.00353-11 [doi].
- 390 15. **Cunningham, S., B. Johnston, S. Vasoo, J. Johnson, and R. Patel.** 2014. Abstr.  
391 Evaluation of Check-Points Check-MDR CT103 PCR-Microarray Kit for Detection and  
392 Classification of ESBL, AmpC and Carbapenemase Genes. 54th Interscience Conference on  
393 Antimicrobial Agents and Chemotherapy. **Washington, D.C.**..
- 394 16. **Logan, L. K., A. M. Hujer, S. H. Marshall, T. N. Domitrovic, S. D. Rudin, X. Zheng, N.**  
395 **K. Qureshi, M. K. Hayden, F. A. Scaggs, A. Karadkhele, and R. A. Bonomo.** 2016. Analysis  
396 of beta-Lactamase Resistance Determinants in Enterobacteriaceae from Chicago Children: a  
397 Multicenter Survey. *Antimicrob. Agents Chemother.* **60**:3462-3469. doi: 10.1128/AAC.00098-  
398 16 [doi].

- 399 17. **Cano, M. E., J. M. Rodriguez-Martinez, J. Agüero, A. Pascual, J. Calvo, J. M. Garcia-**  
400 **Lobo, C. Velasco, M. V. Francia, and L. Martinez-Martinez.** 2009. Detection of plasmid-  
401 mediated quinolone resistance genes in clinical isolates of *Enterobacter* spp. in Spain. *J. Clin.*  
402 *Microbiol.* **47**:2033-2039.
- 403 18. **Hujer, K. M., A. M. Hujer, A. Endimiani, J. M. Thomson, M. D. Adams, K. Goglin, P.**  
404 **N. Rather, T. T. Pennella, C. Massire, M. W. Eshoo, R. Sampath, L. B. Blyn, D. J. Ecker,**  
405 **and R. A. Bonomo.** 2009. Rapid determination of quinolone resistance in *Acinetobacter* spp. *J.*  
406 *Clin. Microbiol.* **47**:1436-1442.
- 407 19. **Endimiani, A., A. M. Hujer, F. Perez, C. R. Bethel, K. M. Hujer, J. Kroeger, M.**  
408 **Oethinger, D. L. Paterson, M. D. Adams, M. R. Jacobs, D. J. Diekema, G. S. Hall, S. G.**  
409 **Jenkins, L. B. Rice, F. C. Tenover, and R. A. Bonomo.** 2009. Characterization of blaKPC-  
410 containing *Klebsiella pneumoniae* isolates detected in different institutions in the Eastern USA.  
411 *J. Antimicrob. Chemother.* **63**:427-437.
- 412 20. **Jacoby, G. A.** 2017. Plasmid-mediated quinolone resistance, p. 265-268. *In* Anonymous  
413 *Antimicrobial Drug Resistance.* Springer.
- 414 21. **Chen, X., W. Zhang, W. Pan, J. Yin, Z. Pan, S. Gao, and X. Jiao.** 2012. Prevalence of  
415 qnr, aac(6')-Ib-cr, qepA, and oqxAB in *Escherichia coli* Isolates from Humans, Animals, and  
416 Environment. *Antimicrobial Agents and Chemotherapy.* . doi: 10.1128/AAC.06191-11.
- 417 22. **Diancourt, L., V. Passet, J. Verhoef, P. A. Grimont, and S. Brisse.** 2005. Multilocus  
418 sequence typing of *Klebsiella pneumoniae* nosocomial isolates. *J. Clin. Microbiol.* **43**:4178-  
419 4182. doi: 10.1128/JCM.43.8.4178-4182 [pii].
- 420 23. **Jauregui, F., L. Landraud, V. Passet, L. Diancourt, E. Frapy, G. Guigon, E.**  
421 **Carbannelle, O. Lortholary, O. Clermont, E. Denamur, B. Picard, X. Nassif, and S. Brisse.**  
422 2008. Phylogenetic and genomic diversity of human bacteremic *Escherichia coli* strains. *BMC*  
423 *Genomics.* **9**:560-2164-9-560. doi: 10.1186/1471-2164-9-560 [doi].
- 424 24. **Bingen-Bidois, M., O. Clermont, S. Bonacorsi, M. Terki, N. Brahimi, C. Loukil, D.**  
425 **Barraud, and E. Bingen.** 2002. Phylogenetic analysis and prevalence of urosepsis strains of  
426 *Escherichia coli* bearing pathogenicity island-like domains. *Infect. Immun.* **70**:3216-3226.
- 427 25. **Carattoli, A., A. Bertini, L. Villa, V. Falbo, K. L. Hopkins, and E. J. Threlfall.** 2005.  
428 Identification of plasmids by PCR-based replicon typing. *J. Microbiol. Methods.* **63**:219-228.  
429 doi: <http://dx.doi.org/10.1016/j.mimet.2005.03.018>.
- 430 26. **Centers for Disease Control and Prevention (CDC).** 2017. The National Healthcare Safety  
431 Network (NHSN) Patient Safety Component Manual. .
- 432 27. **Canton, R., J. M. Gonzalez-Alba, and J. C. Galan.** 2012. CTX-M Enzymes: Origin and  
433 Diffusion. *Front. Microbiol.* **3**:110. doi: 10.3389/fmicb.2012.00110 [doi].

- 434 28. **Carattoli, A.** 2009. Resistance plasmid families in Enterobacteriaceae. *Antimicrob. Agents*  
435 *Chemother.* **53**:2227-2238. doi: 10.1128/AAC.01707-08 [doi].
- 436 29. **Zerr, D. M., X. Qin, A. P. Oron, A. L. Adler, D. J. Wolter, J. E. Berry, L. Hoffman, and**  
437 **S. J. Weissman.** 2014. Pediatric infection and intestinal carriage due to extended-spectrum-  
438 cephalosporin-resistant Enterobacteriaceae. *Antimicrob. Agents Chemother.* **58**:3997-4004. doi:  
439 10.1128/AAC.02558-14 [doi].
- 440 30. **Islam, S., R. Selvarangan, N. Kanwar, R. McHenry, J. D. Chappell, N. Halasa, M. E.**  
441 **Wiksw, D. C. Payne, P. H. Azimi, L. C. McDonald, and O. G. Gomez-Duarte.** 2017 Jun 15.  
442 Intestinal Carriage of Third-Generation Cephalosporin-Resistant and Extended-Spectrum beta-  
443 Lactamase-Producing Enterobacteriaceae in Healthy US Children. *Journal of the Pediatric*  
444 *Infectious Diseases Societ.* .
- 445 31. **Lin, M. Y., R. D. Lyles-Banks, K. Lolans, D. W. Hines, J. B. Spear, R. Petrak, W. E.**  
446 **Trick, R. A. Weinstein, M. K. Hayden, and Centers for Disease Control and Prevention**  
447 **Epicenters Program.** 2013. The importance of long-term acute care hospitals in the regional  
448 epidemiology of *Klebsiella pneumoniae* carbapenemase-producing Enterobacteriaceae. *Clinical*  
449 *Infectious Diseases.* **57**:1246-1252.
- 450 32. **Logan, L. K., L. A. Meltzer, J. B. McAuley, M. K. Hayden, T. Beck, N. P. Braykov, R.**  
451 **Laxminarayan, and R. A. Weinstein.** 2014. Extended-Spectrum  $\beta$ -Lactamase-Producing  
452 Enterobacteriaceae Infections in Children: A Two-Center Case–Case–Control Study of Risk  
453 Factors and Outcomes in Chicago, Illinois. *Journal of the Pediatric Infectious Diseases Society.*  
454 **3**:312-319.
- 455 33. **Kuenzli, E., V. K. Jaeger, R. Frei, A. Neumayr, S. DeCrom, S. Haller, J. Blum, A. F.**  
456 **Widmer, H. Furrer, and M. Battegay.** 2014. High colonization rates of extended-spectrum  $\beta$ -  
457 lactamase (ESBL)-producing *Escherichia coli* in Swiss Travellers to South Asia—a prospective  
458 observational multicentre cohort study looking at epidemiology, microbiology and risk factors.  
459 *BMC Infectious Diseases.* **14**:528.
- 460 34. **Stryzko, J. P., V. Mony, J. Cleveland, H. Siddiqui, P. Homel, and C. Gagliardo.** 2016.  
461 International travel is a risk factor for extended-spectrum  $\beta$ -lactamase-producing  
462 Enterobacteriaceae acquisition in children: A case-case-control study in an urban US hospital.  
463 *Travel Medicine and Infectious Disease.* **14**:568-571.
- 464 35. **Laupland, K. B., D. L. Church, J. Vidakovich, M. Mucenski, and J. D. Pitout.** 2008.  
465 Community-onset extended-spectrum  $\beta$ -lactamase (ESBL) producing *Escherichia coli*:  
466 importance of international travel. *J. Infect.* **57**:441-448.
- 467 36. **Paltansing, S., J. A. Vlot, M. E. Kraakman, R. Mesman, M. L. Bruijning, A. T.**  
468 **Bernards, L. G. Visser, and K. E. Veldkamp.** 2013. Extended-spectrum beta-lactamase-  
469 producing enterobacteriaceae among travelers from the Netherlands. *Emerg. Infect. Dis.*  
470 **19**:1206-1213. doi: 10.3201/eid.1908.130257 [doi].

- 471 37. **Silbergeld, E. K., J. Graham, and L. B. Price.** 2008. Industrial food animal production,  
472 antimicrobial resistance, and human health. *Annu. Rev. Public Health.* **29**:151-169.
- 473 38. **Riley, L. W., E. Raphael, and E. Faerstein.** 2013. Obesity in the United States - dysbiosis  
474 from exposure to low-dose antibiotics? *Front. Public. Health.* **1**:69. doi:  
475 10.3389/fpubh.2013.00069 [doi].
- 476 39. **Cox, L. M., and M. J. Blaser.** 2015. Antibiotics in early life and obesity. *Nature Reviews*  
477 *Endocrinology.* **11**:182-190.
- 478 40. **Steinberger, J., S. R. Daniels, American Heart Association Atherosclerosis,**  
479 **Hypertension, and Obesity in the Young Committee (Council on Cardiovascular Disease in**  
480 **the Young), and American Heart Association Diabetes Committee (Council on Nutrition,**  
481 **Physical Activity, and Metabolism).** 2003. Obesity, insulin resistance, diabetes, and  
482 cardiovascular risk in children: an American Heart Association scientific statement from the  
483 Atherosclerosis, Hypertension, and Obesity in the Young Committee (Council on Cardiovascular  
484 Disease in the Young) and the Diabetes Committee (Council on Nutrition, Physical Activity, and  
485 Metabolism). *Circulation.* **107**:1448-1453.
- 486 41. **Hansen, L. H., S. J. Sørensen, H. S. Jørgensen, and L. B. Jensen.** 2005. The prevalence of  
487 the OqxAB multidrug efflux pump amongst olaquinox-resistant *Escherichia coli* in pigs.  
488 *Microbial Drug Resistance.* **11**:378-382.
- 489 42. **Goyal, M. K., T. J. Johnson, J. M. Chamberlain, T. C. Casper, T. Simmons, E. A.**  
490 **Alessandrini, L. Bajaj, R. W. Grundmeier, J. S. Gerber, S. A. Lorch, E. R. Alpern, and**  
491 **Pediatric Care Applied Research Network (PECARN).** 2017. Racial and Ethnic Differences  
492 in Antibiotic Use for Viral Illness in Emergency Departments. *Pediatrics.* . doi: e20170203 [pii].
- 493 43. **Klevens, R. M., M. A. Morrison, J. Nadle, S. Petit, K. Gershman, S. Ray, L. H.**  
494 **Harrison, R. Lynfield, G. Dumyati, and J. M. Townes.** 2007. Invasive methicillin-resistant  
495 *Staphylococcus aureus* infections in the United States. *Jama.* **298**:1763-1771.
- 496 44. **Popovich, K. J., R. A. Weinstein, A. Aroutcheva, T. Rice, and B. Hota.** 2010.  
497 Community-associated methicillin-resistant *Staphylococcus aureus* and HIV: intersecting  
498 epidemics. *Clinical Infectious Diseases.* **50**:979-987.
- 499 45. **Zerr, D. M., S. J. Weissman, C. Zhou, M. P. Kronman, A. L. Adler, J. E. Berry, J.**  
500 **Rayar, J. Myers, W. L. Haaland, and C. D. Burnham.** 2017. The Molecular and Clinical  
501 Epidemiology of Extended-Spectrum Cephalosporin- and Carbapenem-Resistant  
502 Enterobacteriaceae at 4 US Pediatric Hospitals. *Journal of the Pediatric Infectious Diseases*  
503 *Society.* piw076.
- 504 46. **Logan, L. K., N. P. Braykov, R. A. Weinstein, and R. Laxminarayan.** 2014. Extended-  
505 spectrum  $\beta$ -lactamase-producing and third-generation cephalosporin-resistant  
506 Enterobacteriaceae in children: trends in the United States, 1999–2011. *Journal of the Pediatric*  
507 *Infectious Diseases Society.* **3**:320-328.

508 47. **Lukac, P. J., R. A. Bonomo, and L. K. Logan.** 2015. Extended-spectrum  $\beta$ -lactamase–  
509 producing Enterobacteriaceae in children: old foe, emerging threat. *Clinical Infectious Diseases*.  
510 **60**:1389-1397.

511 48. **Logan, L. K., J. P. Renschler, S. Gandra, R. A. Weinstein, R. Laxminarayan, Centers**  
512 **for Disease Control, and Prevention Epicenters Program.** 2015. Carbapenem-Resistant  
513 Enterobacteriaceae in Children, United States, 1999-2012. *Emerg. Infect. Dis.* **21**:2014-2021.  
514 doi: 10.3201/eid2111.150548 [doi].

515 49. **Logan, L. K., and R. A. Bonomo.** 2016. Metallo- $\beta$ -lactamase (MBL)-producing  
516 Enterobacteriaceae in United States children *In* Anonymous Open forum infectious diseases.  
517 Oxford University Press.

518

## CHARACTERISTICS OF FQR AND PMFQR ENTEROBACTERIACEAE

| Variable <sup>a</sup>         | FQR Ent   | PMFQR Ent |
|-------------------------------|-----------|-----------|
| Patient                       | n=82      | n=53      |
| Organism <sup>b</sup>         |           |           |
| <i>E. coli</i>                | 65 (79.3) | 40 (75.5) |
| <i>Klebsiella sp.</i>         | 7 (8.5)   | 7 (13.2)  |
| <i>Proteus sp.</i>            | 7 (8.5)   | 4 (7.5)   |
| <i>Enterobacter sp.</i>       | 3 (3.7)   | 2 (3.8)   |
| Other                         | 0(0)      | 0 (0)     |
| Source                        |           |           |
| Urine                         | 58 (70.7) | 37 (69.8) |
| Respiratory                   | 12 (14.6) | 7 (13.2)  |
| Abscess/Wound                 | 4 (4.9)   | 3 (5.7)   |
| Blood                         | 3 (3.7)   | 3 (5.7)   |
| Peritoneal/Abdomen            | 2 (2.4)   | 1 (1.9)   |
| Central Nervous System        | 1 (1.2)   | 1 (1.9)   |
| Other                         | 2 (2.4)   | 1 (1.9)   |
| Co-Antibiotic Resistance      |           |           |
| Trimethoprim/Sulfamethoxazole | 59 (72.0) | 38 (71.7) |
| Gentamicin                    | 44 (53.7) | 35 (66.0) |
| Amikacin                      | 3 (3.7)   | 3 (5.7)   |
| Carbapenem                    | 1 (1.2)   | 1 (1.9)   |

|                                          |           |           |
|------------------------------------------|-----------|-----------|
| <i>Bla</i> gene association <sup>c</sup> |           |           |
| CTX-M-1 <sub>group</sub>                 | 51 (62.2) | 42 (79.2) |
| CTX-M-9 <sub>group</sub>                 | 13 (15.9) | 3 (5.7)   |
| SHV <sub>ESBL</sub>                      | 9 (11.0)  | 6 (11.3)  |
| VEB <sub>ESBL</sub>                      | 1 (1.2)   | 1 (1.9)   |
| CMY <sub>AmpC</sub>                      | 2 (2.4)   | 1 (1.9)   |
| ACT/MIR <sub>AmpC</sub>                  | 4 (4.9)   | 1 (1.9)   |
| KPC <sub>CRE</sub>                       | 1 (1.2)   | 1 (1.9)   |
| Mutation in QRDR <sup>d</sup>            | 71 (89.9) | 43 (87.8) |
| Phylogenetic group of <i>E. coli</i>     | n=65      | n=40      |
| B2                                       | 49 (75.4) | 31 (77.5) |
| D                                        | 11(16.9)  | 6 (15.0)  |
| A                                        | 4 (6.1)   | 3 (7.5)   |
| B1                                       | 1 (1.5)   | 0 (0)     |

<sup>a</sup>Values represent n (%). Abbreviations: Ent, Enterobacteriaceae, FQR,

Flouroquinolone resistant; PMFQR, Plasmid-mediated Fluoroquinolone resistant

<sup>b</sup>One isolate studied per patient

<sup>c</sup> Isolates may harbor one or more *bla* gene.

<sup>d</sup> 3 of the 82 isolates did not yield a result, calculation based on 79 isolates.

**BIVARIATE ANALYSIS OF DEMOGRAPHICS AND FACTORS ASSOCIATED  
WITH PMFQR ENTEROBACTERIACEAE INFECTION**

| Characteristic <sup>a</sup>      | PMFQR Infection | Non-PMFQR Infection <sup>b</sup> | p value |
|----------------------------------|-----------------|----------------------------------|---------|
| Patient                          | n=53            | n=131                            |         |
| Location at Diagnosis            |                 |                                  | <0.0001 |
| Inpatient, non ICU               | 21 (39.6)       | 46 (35.1)                        |         |
| Outpatient Clinic                | 16 (30.2)       | 7 (5.3)                          |         |
| Emergency Room                   | 4 (7.6)         | 23 (17.6)                        |         |
| Pediatric ICU                    | 11 (20.8)       | 37 (28.2)                        |         |
| Neonatal ICU                     | 1 (1.9)         | 18 (13.7)                        |         |
| Region of Residence <sup>d</sup> |                 |                                  | 0.047   |
| Downtown                         | 1 (1.9)         | 19 (14.5)                        |         |
| Northwest                        | 6 (11.3)        | 14 (10.7)                        |         |
| Far North                        | 14 (26.4)       | 25 (19.1)                        |         |
| West                             | 12 (26.4)       | 36 (27.5)                        |         |



|                              |           |           |       |
|------------------------------|-----------|-----------|-------|
| Southwest                    | 10 (18.9) | 8 (6.1)   |       |
| South                        | 2 (3.8)   | 12 (9.2)  |       |
| Far South                    | 3 (5.7)   | 8 (6.1)   |       |
| Other IL/Other states        | 3 (5.7)   | 9 (6.9)   |       |
| Recent Health Care           |           |           | 0.406 |
| Inpatient Care               | 12 (22.6) | 31 (23.7) |       |
| Outpatient Care <sup>c</sup> | 31 (58.5) | 64 (48.9) |       |
| No Recent Care               | 10 (18.9) | 36 (27.5) |       |
| Central venous line          | 9 (17.0)  | 44 (33.6) | 0.025 |
| Gastrointestinal             | 13 (24.5) | 45 (34.4) | 0.195 |
| Genitourinary                | 14 (26.4) | 37 (28.2) | 0.802 |
| Respiratory                  | 11 (20.8) | 38 (29.0) | 0.253 |

<sup>a</sup> Values represent n (%) unless otherwise indicated.

<sup>b</sup> Non-PMFQR Infection were children with infections due to Enterobacteriaceae sensitive to extended spectrum cephalosporin and fluoroquinolone antibiotics.

<sup>c</sup> Other sources include abscess/wound, peritoneal/abdomen, or other organ systems

<sup>d</sup> Region of residence includes city region and neighboring suburbs, except for “Downtown”, which includes downtown, near North side, loop, and Northside, all within city limits. “Other” includes other cities in Illinois not neighboring Chicago, and patients from other states.

<sup>e</sup> Includes extended-spectrum cephalosporins (ceftriaxone, ceftazidime, cefotaxime, cefepime)

<sup>f</sup> Abbreviation PMFQR, Plasmid-mediated Fluoroquinolone Resistance; TMP-SMX, Trimethoprim-Sulfamethoxazole.

<sup>g</sup> Outpatient care includes care outside of routine child care visits and outpatient procedures.

MULTIVARIABLE ANALYSIS OF FACTORS ASSOCIATED WITH PMFQR  
ENTEROBACTERIACEAE INFECTIONS IN CHILDREN

| Associated Factor with PMFQR infection <sup>a</sup>                  | OR   | 95% CI      | p value |
|----------------------------------------------------------------------|------|-------------|---------|
| Outpatient Clinic Location at time of infection diagnosis            | 33.9 | 7.08, 162.8 | <0.001  |
| Race not white, black or Hispanic                                    | 6.5  | 1.70, 24.3  | 0.006   |
| Home Residence in Southwest Region (SW Chicago and SW Suburbs)       | 5.6  | 1.6, 19.2   | 0.006   |
| Home Residence in Downtown Region (Near North Side, Loop, Northside) | 0.03 | 0.002, 0.33 | 0.005   |

<sup>a</sup> Abbreviations, SW, Southwest; Loop, Chicago Loop.

<sup>b</sup> Reference Region, West Region.
